# Supplementary material for: High-performance flexible ZnO nanorod UV photodetectors with a network-structured Cu nanowire electrode
Source: Royal Society of Chemistry journal article supplement (doi:10.1039/c6nr05256h), 2016-01-01
Supplement: c6nr05256h1.pdf [file c6nr05256h1.pdf]

## Supporting Information

### **High-performance flexible ZnO nanorod UV photodetectors with network-structured Cu nanowire electrode**

**Do-Kyun Kwon, Su Jeong Lee, and Jae-Min Myoung\***

*Department of Materials Science and Engineering, Yonsei University, 50 Yonsei-ro, Seodaemun-gu,  
Seoul 120-749, Republic of Korea*

\*E-mail address: [jmmyoung@yonsei.ac.kr](mailto:jmmyoung@yonsei.ac.kr)

## FIGURES

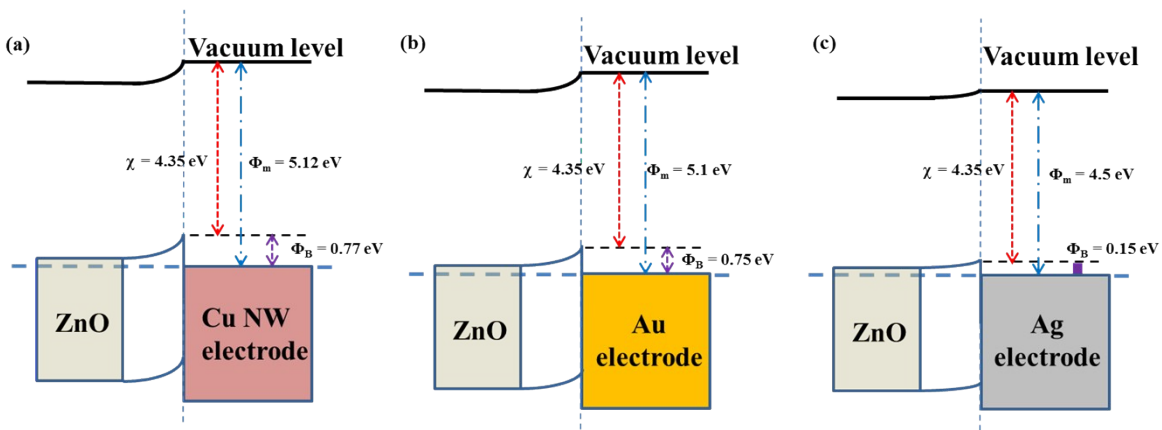

**Fig. S1** Schematic energy band diagrams at the junctions of (a) ZnO NR layer/Cu NW electrode, (b) ZnO NR layer/Au electrode, and (c) ZnO NR layer/Ag electrode.

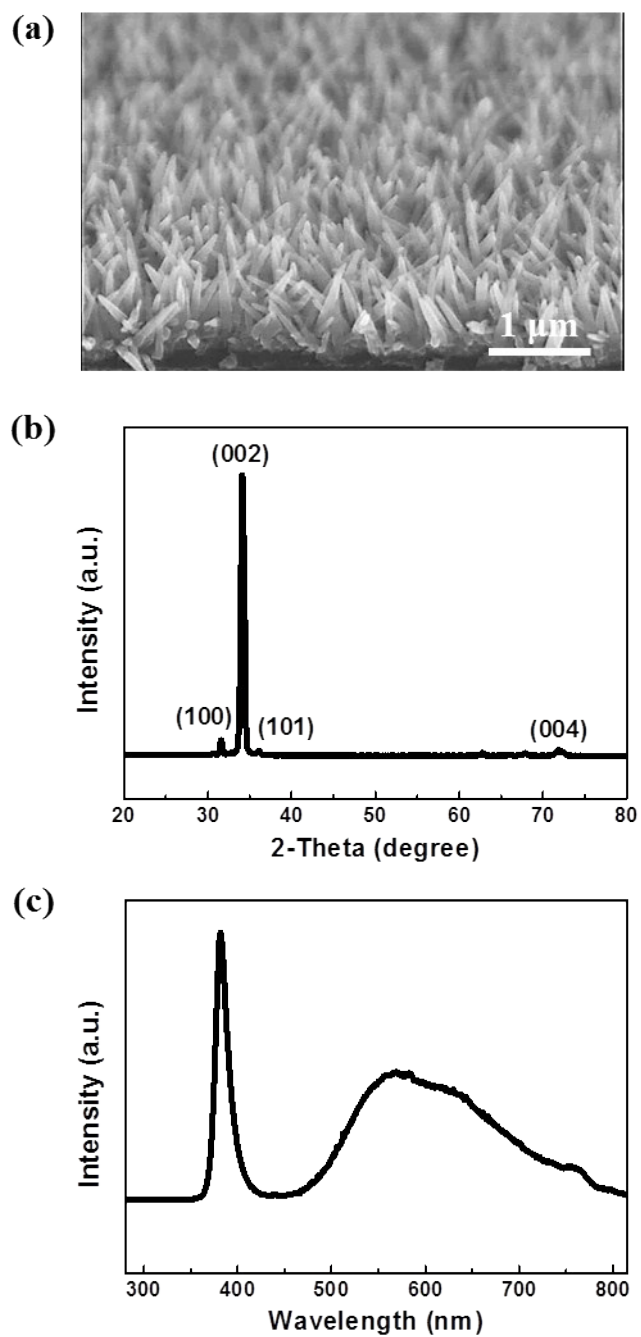

**Fig. S2** Material properties of ZnO NRs: (a) 40°-tilted SEM image, (b) XRD pattern, and (c) Room-temperature PL spectra.

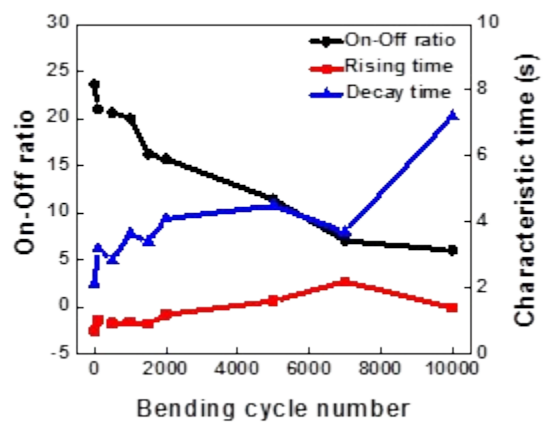

**Fig. S3** On-off ratio, rising and decay times during the dynamic bending test up to 10000 cycles with a radius of curvature of 5 mm.
